CORRECTION

# Correction: Artificial neural network, machine learning modelling of compressive strength of recycled coarse aggregate based self-compacting concrete

P. Jagadesh, Afzal Husain Khan, B. Shanmuga Priya, A. Asheeka, Zineb Zoubir, Hassan M. Magbool, Shamshad Alam, Omer Y. Bakather

The second author's name is spelled incorrectly. The correct name is: Afzal Husain Khan.

The Funding statement for this paper is incorrect. The correct Funding statement is as follows: The authors extended their appreciation to the Deputyship for Research & innovation, Ministry of Education in Saudi Arabia for funding this research work though the project work number ISP23–144.

## Reference

1. Jagadesh P, Khan AH, Priya BS, Asheeka A, Zoubir Z, Magbool HM, et al. Artificial neural network, machine learning modelling of compressive strength of recycled coarse aggregate based self-compacting concrete. PLoS One. 2024;19(5): e0303101. <https://doi.org/10.1371/journal.pone.0303101> PMID: [38739642](https://pubmed.ncbi.nlm.nih.gov/38739642/)

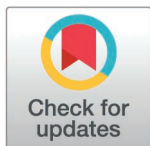

## OPEN ACCESS

**Citation:** Jagadesh P, Khan AH, Priya BS, Asheeka A, Zoubir Z, Magbool HM, et al. (2025) Correction: Artificial neural network, machine learning modelling of compressive strength of recycled coarse aggregate based self-compacting concrete. PLoS ONE 20(4): e0322947. <https://doi.org/10.1371/journal.pone.0322947>

**Published:** April 22, 2025

**Copyright:** © 2025 Jagadesh et al. This is an open access article distributed under the terms of the [Creative Commons Attribution License](https://creativecommons.org/licenses/by/4.0/), which permits unrestricted use, distribution, and reproduction in any medium, provided the original author and source are credited.
